# Supplementary material for: Targeting epidermal growth factor receptor to recruit newly generated neuroblasts in cortical brain injuries
Source: J Transl Med. 2023 Nov 30;21:867. doi: 10.1186/s12967-023-04707-1 (PMC10687845; doi:10.1186/s12967-023-04707-1)
Supplement: Supplementary file 1 — Additional file 1: Figure S1. Inhibition of EGFR does not change the number of SVZ ZSGreen+ neuroblasts in response to a cortical injury. Figure S2. Inhibition of EGFR does not change the number of OB ZSGreenneuroblasts in response to a cortical injury. Table S1. List of primary antibodies used in the study. Specifying host, isotype, dilution used, epitope retrieval, staining pattern, source and reference. Table S2. List of secondary antibodies used in the study. Specifying host, dilution used, fluorescence conjugated, source and reference. [file 12967_2023_4707_MOESM1_ESM.pdf]

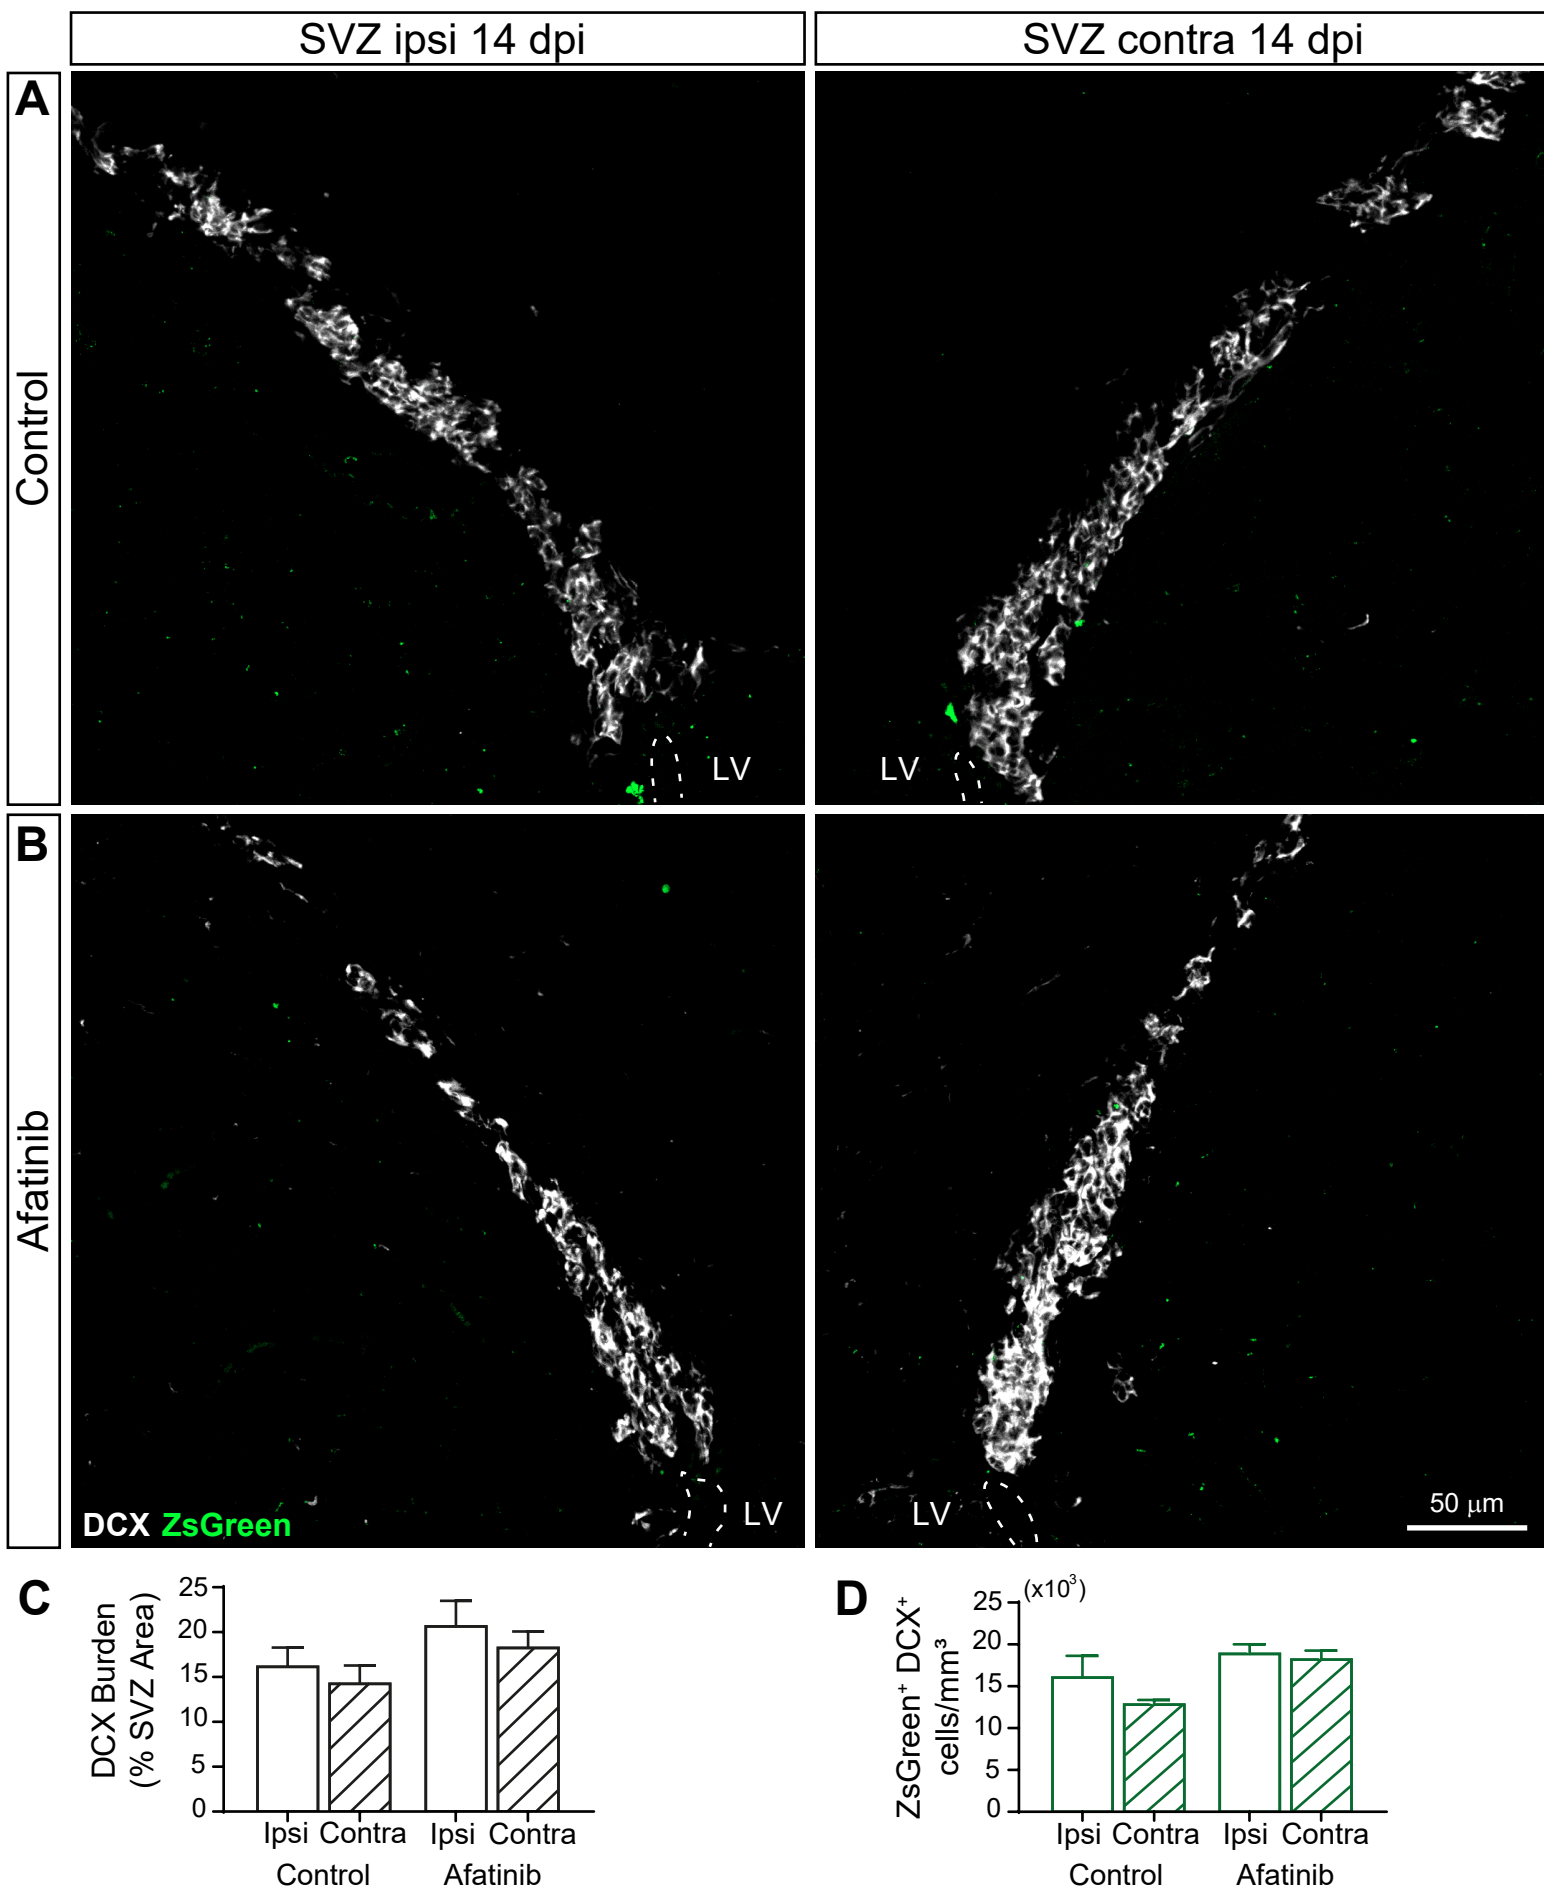

**Additional file 1: Figure S1. Inhibition of EGFR does not change the number of SVZ ZsGreen<sup>+</sup>neuroblasts in response to a cortical injury.** Mice were mechanically injured in the primary motor cortex and were injected in the lateral ventricle (LV) with a control lentivirus that express the green fluorescent protein ZsGreen. Mice were treated for 14 days with intranasal administrations of the EGFR inhibitor Afatinib (5  $\mu$ M) or vehicle. **A.** Representative confocal images of adult mouse injured cortex processed for the detection of DCX and ZsGreen treated only with vehicle. **B.** Representative confocal images adult mouse injured cortex treated with Afatinib showing ZsGreen fluorescence and the immunodetection of DCX. Scale bar represents 50  $\mu$ m. **C.** Graph represents the DCX burden as a percentage of SVZ total area. **D.** Graph represents the number of ZsGreen<sup>+</sup> and DCX<sup>+</sup> cells in the SVZ. One-way ANOVA was used for statistical analysis. Data are the mean  $\pm$  S.E.M; n=6 animals per group.

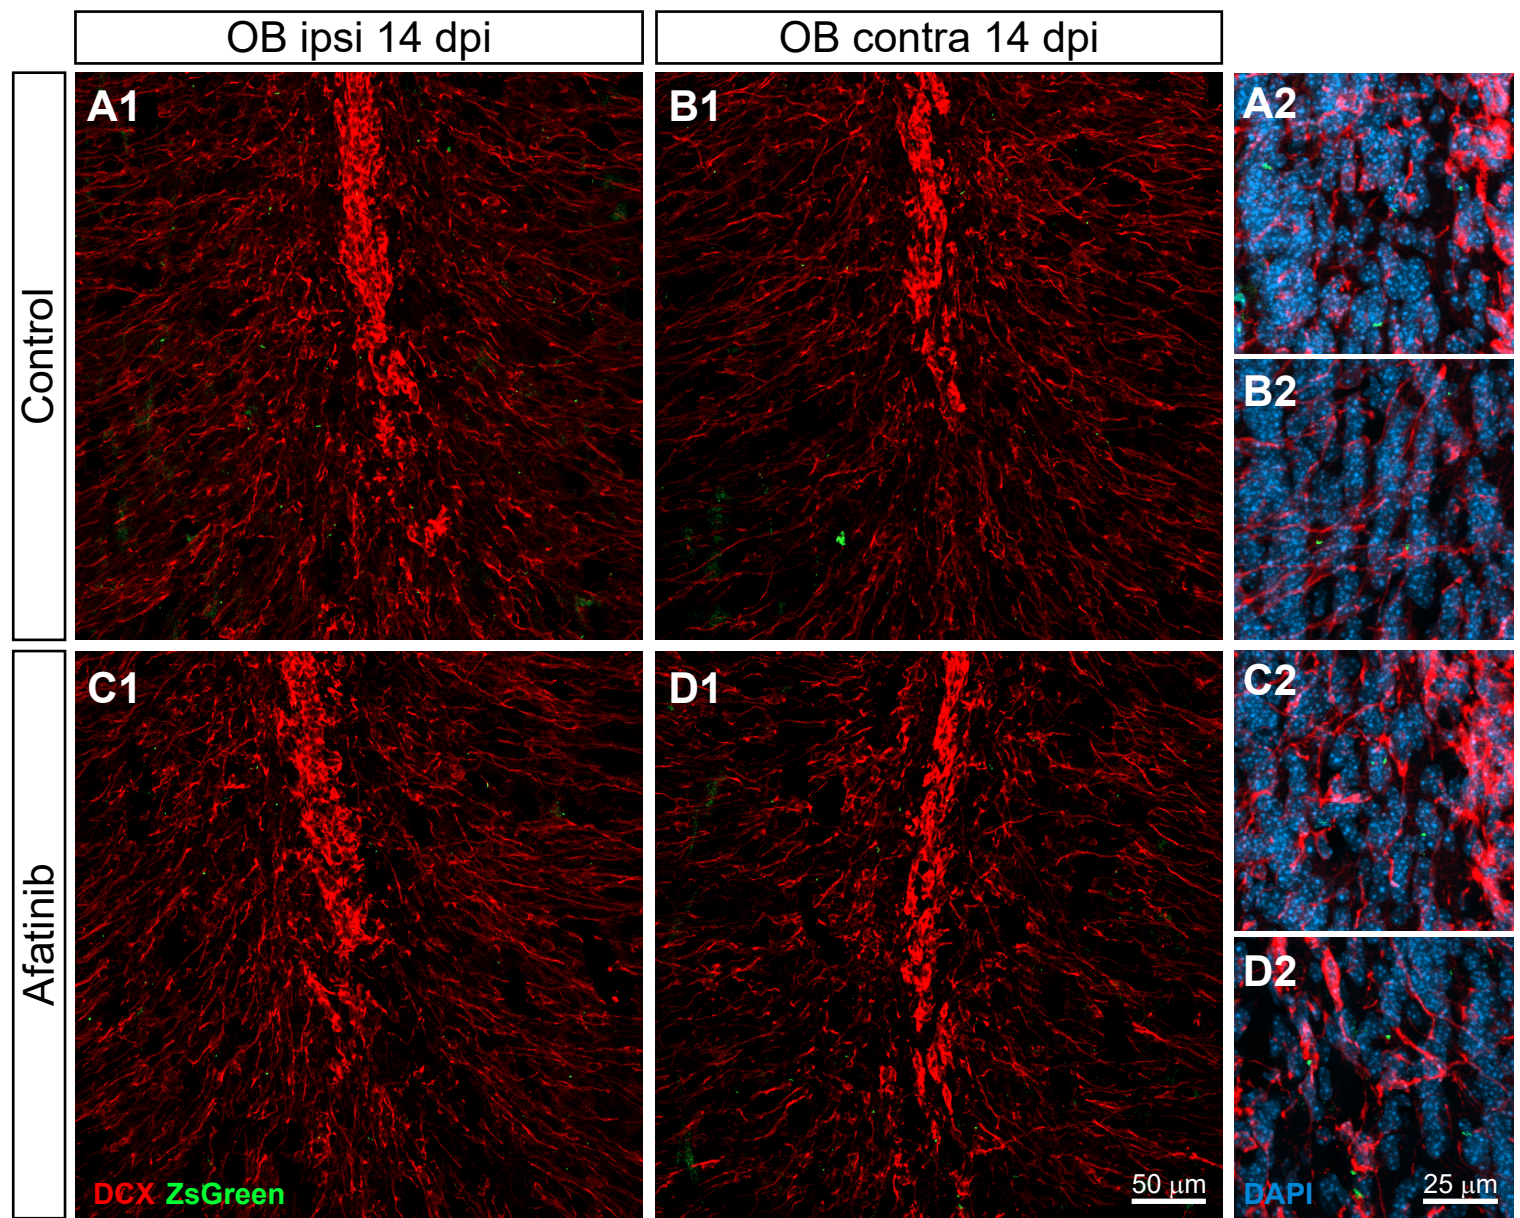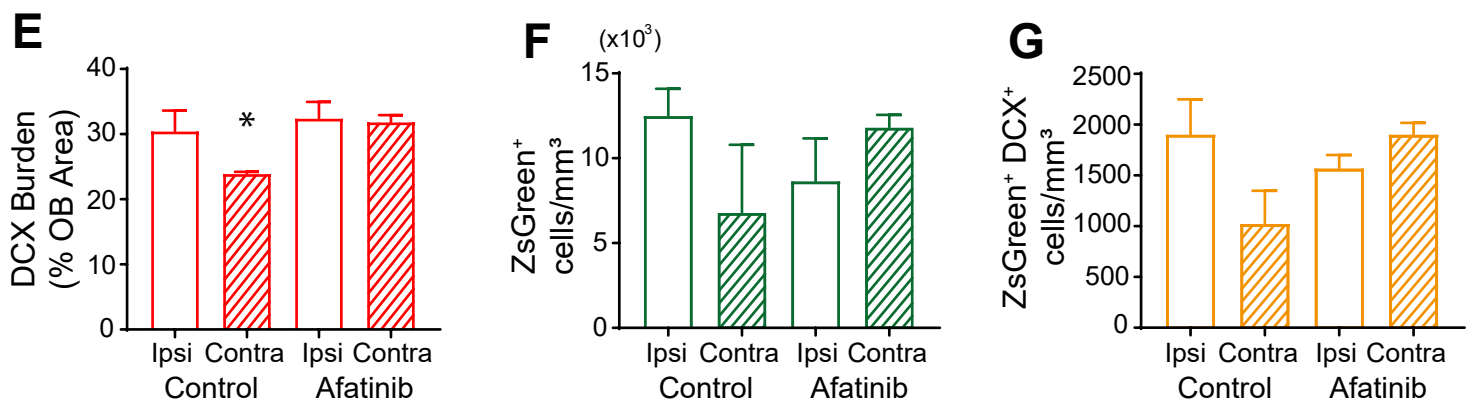

**Additional file 1: Figure S2. Inhibition of EGFR does not change the number of OB ZsGreen<sup>+</sup> neuroblasts in response to a cortical injury.** Mice were mechanically injured in the primary motor cortex and were injected in the lateral ventricle (LV) with a control lentivirus that express the green fluorescent protein ZsGreen. Mice were treated for 14 days with intranasal administrations of the EGFR inhibitor Afatinib (5  $\mu$ M) or vehicle. **A1, B1.** Representative confocal images of adult mouse injured cortex processed for the detection of DCX and ZsGreen treated only with vehicle. Magnification of representative cells showing DCX<sup>+</sup> ZsGreen<sup>+</sup> DAPI<sup>+</sup> cells are represented in **A2** and **B2**. **C1, D1.** Representative confocal images adult mouse injured cortex treated with Afatinib showing ZsGreen fluorescence and the immunodetection of DCX. Magnification of representative cells showing DCX<sup>+</sup> ZsGreen<sup>+</sup> DAPI<sup>+</sup> cells are represented in **C2** and **D2**. Scale bar represents 50  $\mu$ m. **E.** Graph represents the DCX burden as a percentage of OB total area. **F.** Graph represents the number of ZsGreen<sup>+</sup> cells in the OB. **G.** Graph represents the number of ZsGreen<sup>+</sup> and DCX<sup>+</sup> cells in the OB. One-way ANOVA was used for statistical analysis: \*  $p < 0.05$  each condition compared with contra control. Data are the mean  $\pm$  S.E.M;  $n = 6$  animals per group.

| Antibody          | Host   | Isotype    | Dilution | Epitope retrieval                                | Staining pattern | Source                                 | Reference |
|-------------------|--------|------------|----------|--------------------------------------------------|------------------|----------------------------------------|-----------|
| Anti-DCX          | Rabbit | polyclonal | 1:750    | DCX, neuroblast marker                           | cytoplasmic      | Abcam<br>(Cambridge, UK)               | ab18723   |
| Anti-DCX          | Goat   | polyclonal | 1:200    | DCX, neuroblast marker                           | cytoplasmic      | Abcam<br>(Cambridge, UK)               | ab113435  |
| Anti-EGFR         | Sheep  | polyclonal | 1:200    | EGFR, epidermic growth factor receptor           | cytoplasmic      | Merk Millipore<br>(Billerica, Ma, USA) | 06-847    |
| Anti-Iba1         | Rabbit | monoclonal | 1:500    | Iba1, microglia marker                           | cytoplasmatic    | Abcam<br>(Cambridge, UK)               | ab178846  |
| Anti-Ki67         | Rabbit | polyclonal | 1:500    | Ki67, proliferation marker                       | nuclear          | Abcam<br>(Cambridge, UK)               | ab15580   |
| Anti-TGF $\alpha$ | Mouse  | monoclonal | 1:100    | TGF- $\alpha$ , Transforming Growth Factor Alpha | cytoplasmatic    | Santa Cruz<br>Biotechnology (Santa     | sc-374433 |

**Additional file 1: Table S1.** List of primary antibodies used in the study. Specifying host, isotype, dilution used, epitope retrieval, staining pattern, source and reference.

| Antibody                | Host   | Dilution | Fluorescence | Source                            | Reference |
|-------------------------|--------|----------|--------------|-----------------------------------|-----------|
| Alexa Flour anti-rabbit | Donkey | 1:1000   | 647          | Invitrogen<br>(Carlsbad, CA, USA) | A32795    |
| Alexa Flour anti-mouse  | Donkey | 1:1000   | 488          | Invitrogen<br>(Carlsbad, CA, USA) | A-21206   |
| Alexa Flour anti-mouse  | Donkey | 1:1000   | 594          | Invitrogen<br>(Carlsbad, CA, USA) | A-21203   |
| Alexa Flour anti-sheep  | Donkey | 1:1000   | 594          | Invitrogen<br>(Carlsbad, CA, USA) | A-11016   |
| Alexa Flour anti-rabbit | Donkey | 1:1000   | 594          | Invitrogen<br>(Carlsbad, CA, USA) | A-21207   |
| Alexa Flour anti-rabbit | Donkey | 1:1000   | 488          | Invitrogen<br>(Carlsbad, CA, USA) | A-21206   |
| Alexa Flour -anti-goat  | Donkey | 1:1000   | 594          | Invitrogen<br>(Carlsbad, CA, USA) | A-11058   |

**Additional file 1: Table S2. Secondary antibodies supplementary table 2:** List of secondary antibodies used in the study. Specifying host, dilution used, fluorescence conjugated, source and reference.
